# Supplementary material for: Controlled synthesis of PEGylated surface protein-imprinted nanoparticles
Source: Royal Society of Chemistry journal article supplement (doi:10.1039/c9an01221d), 2019-01-01
Supplement: c9an01221d1.pdf [file c9an01221d1.pdf]

## Supporting Information

### Controlled synthesis of PEGylated surface protein-imprinted nanoparticles

Xue Yang<sup>a</sup>, Yan Sun<sup>a</sup>, Yang Xiang<sup>b</sup>, Fengtao Qiu<sup>b</sup>, Guoqi Fu<sup>\*,b</sup>

<sup>a</sup> Department of Chemistry, School of Science, Tianjin University, Tianjin 300354, China

<sup>b</sup> Key Laboratory of Functional Polymer Materials of Ministry of Education, Institute of Polymer Chemistry, College of Chemistry, Nankai University, Tianjin 300071, China

\* Corresponding author.

Tel: +86 22 23501443

E-mail address: gqfu@nankai.edu.cn

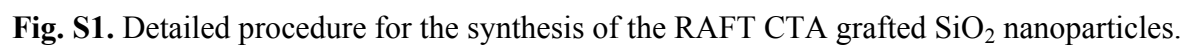

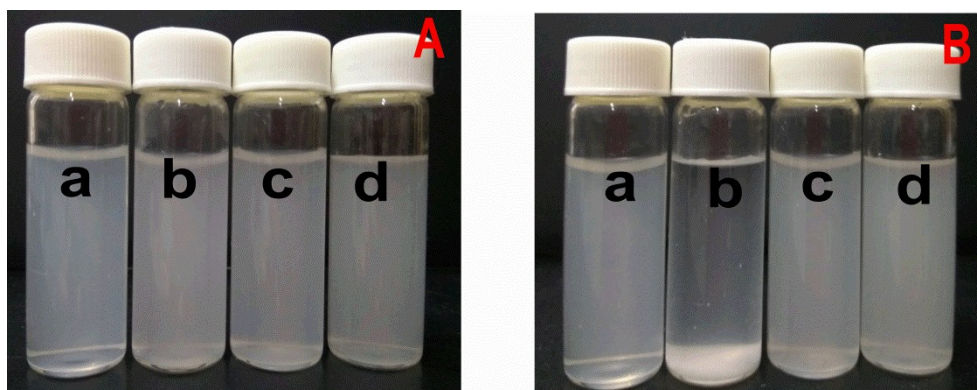

**Fig. S2.** Pictures showing (A) the initial dispersion and (B) that after 1-hour setting in a phosphate buffer (pH 7.0, 10 mM) of the different nanoparticles: (a) SiO<sub>2</sub>, (b) SiO<sub>2</sub>-NH<sub>2</sub>/N<sub>3</sub>, (c) SiO<sub>2</sub>-COOH/N<sub>3</sub>, and (d) SiO<sub>2</sub>-COOH/CTA. All of the particle contents were 1 mg/mL. Initially, all the particles could be dispersed by ultrasound. It is shown that, after 1-hour setting, the SiO<sub>2</sub>-COOH/CTA particles and another kind of carboxyl-bearing particles (SiO<sub>2</sub>-COOH/N<sub>3</sub>) were still stably dispersed like the SiO<sub>2</sub> nanoparticles, in contrast to the SiO<sub>2</sub>-NH<sub>2</sub>/N<sub>3</sub> particles without carboxyl groups. The observed stability can be attributed to the electrostatic repulsion between the deprotonized carboxyl groups.

**Table S1.** Adsorption capacities of the differently modified nanoparticles toward Lyz.

|                                                   | Adsorption capacity <sup>a</sup> (mg/g) |
|---------------------------------------------------|-----------------------------------------|
| SiO <sub>2</sub>                                  | 23.4 ± 0.3                              |
| SiO <sub>2</sub> -NH <sub>2</sub> /N <sub>3</sub> | 4.6 ± 0.2                               |
| SiO <sub>2</sub> -COOH/N <sub>3</sub>             | 45.2 ± 0.6                              |
| SiO <sub>2</sub> -COOH/CTA                        | 37.4 ± 0.4                              |

<sup>a</sup> measured by incubating ~5 mg of different nanoparticles in 1.5 mL of phosphate buffer (pH 7.0, 10 mM) containing 0.6 mg of Lyz at 35 °C for 1 h.

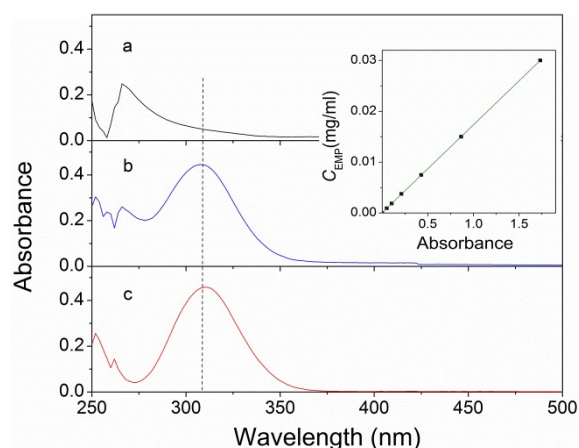

**Fig. S3.** UV–Vis spectra of (a) SiO<sub>2</sub>-COOH/N<sub>3</sub> particles, (b) SiO<sub>2</sub>-COOH/CTA particles and (c) free CTA (EMP) measured in DMF. The concentrations of both particles were 1 mg/mL. The inset is the standard absorption curve of free EMP dissolved in DMF at a wavelength of 308 nm.

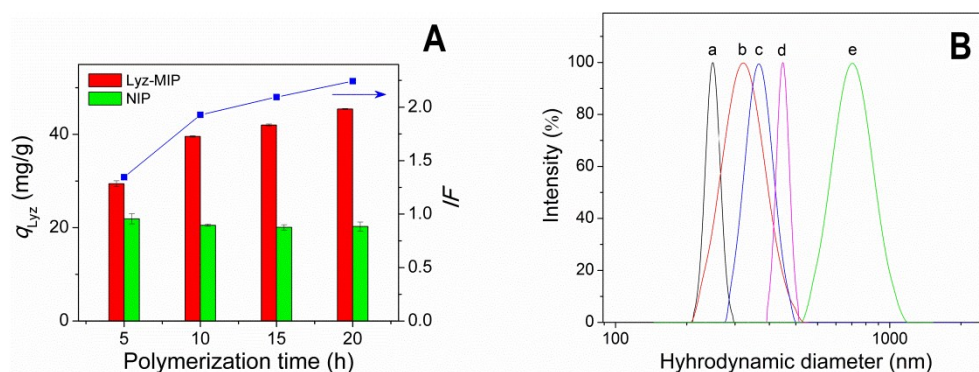

**Fig. S4.** (A) The effect of the first step of SI-RAFT APP time on the imprinting performance of the core-shell Lyz-MIP particles; (B) The hydrodynamic diameters (measured in pure water at 15 °C) of the core-shell Lyz-MIP particles obtained with increasing polymerization time: (a) 0 h (corresponding to the initial SiO<sub>2</sub>-COOH/CTA particles), (b) 5 h, (c) 10 h, (d) 15 h, and (e) 20 h (the average diameters were measured to be 216.0, 333.0, 423.4, 462.6, and 567.7 nm, respectively).

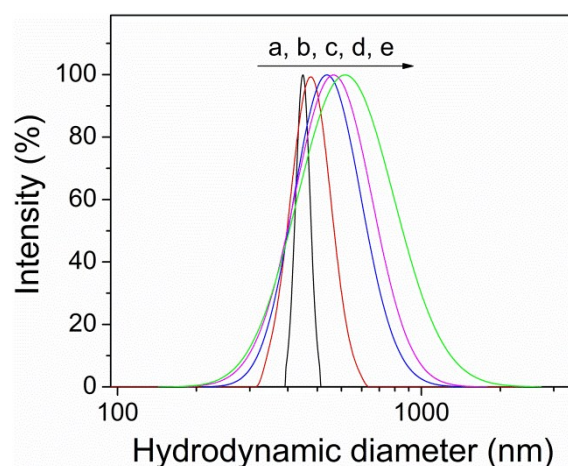

Fig. S5. The hydrodynamic diameters (measured in pure water at 15 °C) of the PEGylated Lyz-MIP particles obtained via the second step of SI-RAFT polymerization with increasing reaction time: (a) 0 h (corresponding to the core-shell structured Lyz-MIP particles), (b) 5 h, (c) 15 h, (d) 24 h, and (e) 36 h.

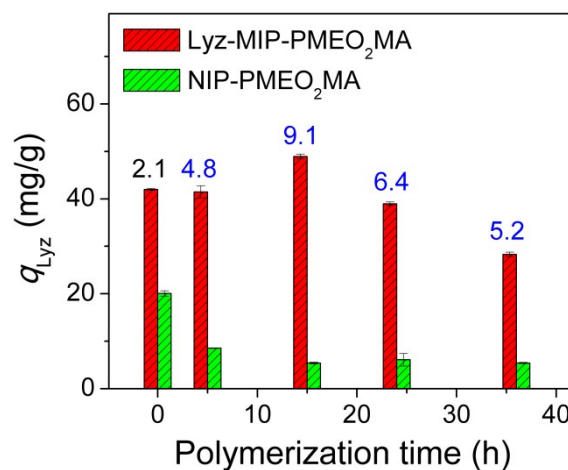

**Fig. S6.** Lyz binding to the Lyz-MIP-PMEO<sub>2</sub>MA and NIP-PMEO<sub>2</sub>MA nanoparticles prepared via the second step of SI-RAFT APP with increasing polymerization time ( $C_0 = 0.4$  mg/mL, 35 °C). The  $IF$  values are indicated above the MIP bars. Actually, at time zero, the corresponding particles are the core-shell Lyz-MIP and NIP, respectively.

**Table S2** Comparison of some Lyz-MIPs synthesized via free radical polymerization in the presence of charged monomers.

| Lyz-MIPs                                                     | Imprinting factor ( <i>IF</i> ) |                   | Refs      |
|--------------------------------------------------------------|---------------------------------|-------------------|-----------|
|                                                              | without NaCl                    | adding NaCl       |           |
| imprinted nanogels                                           | 2.3                             |                   | [1]       |
| surface-imprinted nanoparticles                              | 1.6                             |                   | [2]       |
| surface-imprinted nanoparticles                              | 1.8                             |                   | [3]       |
| surface-imprinted nanoparticles                              | 1.6                             | 2.0 (40 mM NaCl)  | [4]       |
| imprinted hydrogels                                          | 1.2                             | 2.9 (20 mM NaCl)  | [5]       |
| surface-imprinted microparticles                             | 3.6                             |                   | [6]       |
| surface-imprinted nanoparticles <sup>a</sup>                 | 2.4                             |                   | [7]       |
| surface-imprinted nanoparticles                              | 2.3                             | 6.0 (100 mM NaCl) | [8]       |
| imprinted hydrogels <sup>b</sup>                             | ~2.0                            | 8.6 (50 mM NaCl)  | [9]       |
| PMEO <sub>2</sub> MA-grafted surface-imprinted nanoparticles | 9.1                             |                   | this work |

<sup>a</sup> synthesized by copolymerization of MEO<sub>2</sub>MA with MAA and a Cu<sup>2+</sup> chelating monomer based on solution polymerization mechanism, and therefore metal coordination was present besides electrostatic interactions. <sup>b</sup> synthesized using PEG-based cross-linker with ionic monomers.

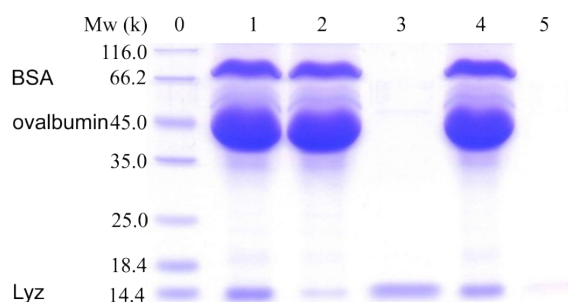

**Fig. S7.** SDS-PAGE analysis for studying the selectivity of the PEGylated Lyz-MIP and NIP nanoparticles toward Lyz from fresh chicken egg-white. Lane 0, protein marker for molecular weights; lane 1, 20-fold diluted egg-white solution; lane 2, the egg-white solution after

adsorption with the Lyz-MIP particles; lane 3, elute from the protein-binding Lyz-MIP particles; lane 4, the egg-white solution after adsorption with the NIP particles; lane 5, elute from the protein-binding NIP particles. Clearly, the MIP particles selectively adsorbed major amounts of Lyz in the egg-white solution (see lane 1, 2 and 3). In contrast, the NIP particles showed quite little binding of Lyz (see lane 1, 4 and 5).

## References

- [1] G.Q. Pan, Q.P. Guo, C.B. Cao, H.L. Yang, B. Li, *Soft Matter* **9** (2013) 3840–3850.
- [2] H.Y. He, G.Q. Fu, Y. Wang, Z.H. Chai; Y.Z. Jiang, Z.L. Chen, *Biosens. Bioelectron.* **26** (2010) 760–765.
- [3] Z.A. Lin, Z.W. Xia, J.N. Zheng, D. Zheng, L. Zhang, H.H. Yang, G.N. Chen, *J. Mater. Chem.* **22** (2012) 17914–17922.
- [4] G.Q. Fu, H.Y. He, Z.H. Chai, H.C. Chen, J. Kong, Y. Wang, Y.Z. Jiang, *Anal. Chem.* **83** (2011) 1431–1436.
- [5] Z.Y. Chen, Z.D. Hua, L. Xu, Y. Huang, M.P. Zhao, Y.Z. Li, *J. Mol. Recognit.* **21** (2008) 71–77.
- [6] Q. R. Li, K. G. Yang, Y. Liang, B. Jiang, J. X. Liu, L. H. Zhang, Z. Liang and Y. K. Zhang, *ACS Appl. Mater. Interfaces* **6** (2014) 21954–21960.
- [7] L. Nan, L. Qi, Y. Shen, J. Qiao and Y. Chen, *ACS Appl. Mater. Interfaces*, **6** (2014), 17289–17295.
- [8] C.C. Yang, X.M. Yan, H. Guo, G.Q. Fu, *Biosen. Bioelectron.* **75** (2016) 129–135.
- [9] T. Kubo, S. Arimura, Y. Tominaga, T. Naito, K. Hosoya and K. Otsuka, *Macromolecules* **48** (2015) 4081–4087.
